# Supplementary material for: Hyper-conjugated lithium carboxylate based on a perylene unit for high-rate organic lithium-ion batteries
Source: Royal Society of Chemistry journal article supplement (doi:10.1039/c4ta02293a), 2014-01-01
Supplement: c4ta02293a1.pdf [file c4ta02293a1.pdf]

**Electronic Supplementary Information**

**Hyper-conjugated lithium carboxylate based on perylene unit for high-rate  
organic lithium-ion batteries**

L. Fédèle,<sup>a-c</sup> F. Sauvage,<sup>a-c</sup> and M. Becuwe,<sup>\*a-c</sup>

<sup>a</sup> *Laboratoire de Réactivité et Chimie des Solides (LRCS), UMR CNRS 7314, Université de  
Picardie Jules Verne (UPJV), Amiens, 33 rue Saint Leu, 80039 Amiens, France.*

<sup>b</sup> *Institut de Chimie de Picardie (ICP), FR CNRS 3085, Amiens, France.*

<sup>c</sup> *Réseau sur le Stockage Electrochimique de l'Energie (RS2E), FR CNRS 3459, France.*

**e-mail :** [matthieu.becuwe@u-picarde.fr](mailto:matthieu.becuwe@u-picarde.fr)

## 15 **1. Experimental details**

### 16 **Reagents and Chemicals**

17 Perylene-3,4,9,10-tetracarboxylic dianhydride (PTCDA) and lithium hydroxide (LiOH) were  
18 purchased from Alfa Aesar and Sigma-Aldrich, respectively. They were used as received  
19 without further purification. De-ionized water was utilized for the synthesis of the tetra-  
20 lithium salt.

### 21 **Instrumentation**

22 FT-IR (Fourier Transform Infra-Red) spectra were recorded in transmission mode at room  
23 temperature using a Nicolet AVATAR 370 DTGS spectrometer from Thermo-Electron.  $^{13}\text{C}$   
24 solid-state NMR spectra were acquired on Bruker AVANCE 500 spectrometer with an  
25 executive frequency of 11.7 T using a 2.5 mm rotor. All chemical shifts were calibrated to  
26 external glycine. The particles morphology and their size were estimated by Scanning  
27 Electron Microscopy (SEM) using an environmental FEI Quanta 200 FEG-microscope.  
28 Thermogravimetric analysis (TGA) were performed on a Netzsch thermal analyzer STA 449C  
29 Jupiter equipped with a differential analysis microbalance coupled with a mass spectrometer  
30 QMS 403 Aëolos. Nitrogen adsorption/desorption isotherm was recorded using a  
31 Micromeritics ASAP 2020 porosimeter at liquid nitrogen temperature. Lithium stoichiometry  
32 was evaluated by flame emission spectrometry (Perkin-Elmer). The calibration curve was  
33 obtained by using lithium standard solutions purchased from Aldrich. The electrochemical  
34 properties were investigated using Swagelok-type cell assembled in an argon-filled glove box.  
35 The working electrode was typically composed of *ca.* 60 mg of active materials (60 %)  
36 manually grinded in a mortar with 40 mg (40 %) of Super P carbon. A lithium metal foil  
37 (Aldrich) was used as both negative and reference electrode. The negative and positive  
38 electrodes were separated by two Whatman fiberglass sheets soaked with battery grade LP30

39 electrolyte from Merck (1 M LiPF<sub>6</sub> in ethylene carbonate / dimethyl carbonate 1/1 volume  
40 mixture).

#### 41 **Hydrolysis and lithiation process**

42 Hyper-conjugated organic lithium carboxylate is synthesized through a one-pot  
43 hydrolysis/lithiation reaction of the perylene-3,4,9,10-tetracarboxylic dianhydride (PTCDA)  
44 to yield the related tetra-lithium salt (Scheme 1).

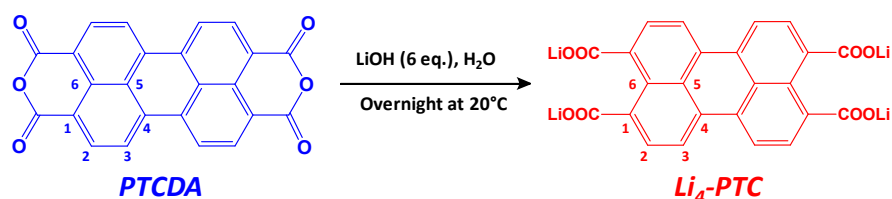

45  
46 **Scheme 1: Synthesis of Tetralithium perylene-3,4,9,10-tetracarboxylate (Li<sub>4</sub>-PTC)**

47 A typical synthesis involves 1 g of PTCDA poured in 100 mL of D.I. water. 6 equivalents of  
48 anhydrous LiOH, prior dissolved in D.I. water, are added dropwise. After 16 hours stirring at  
49 room-temperature / ambient conditions, the red suspension turns into a deep orange color  
50 suggesting an increase of HOMO/LUMO energy gap which stems from the shorten  $\pi$ -  
51 conjugation backbone in Li<sub>4</sub>-PTC. The resulting solid was retrieved by centrifugation, washed  
52 three times with D.I. water and a last time by acetone. The orange powder is then dried under  
53 vacuum at 60 °C for 3 hours before any utilization. The product was systematically stored into  
54 an argon-filled glovebox to avoid water adsorption. The aforementioned reaction leads to  
55 highly polydisperse platelet-like particles whose size lies between 50 nm to 1  $\mu$ m (Figure.  
56 S5). The B.E.T. surface area is determined to *ca.* 75 m<sup>2</sup>.g<sup>-1</sup> based on nitrogen adsorption ( $C_{\text{BET}}$   
57 = 325). Water content was determined using Karl Fischer titration method. Typically, 108 mg  
58 of Li<sub>4</sub>-PTC were dispersed in 10mL of dry hexane or THF (in a close flask) and left 2 hours in  
59 ultrasonic bath. Karl-Fischer titration was then carried out on a Metrohm 831 Karl Fischer  
60 coulometer and repeated three times for each solvent. The results indicated a water content of  
61 only 26 ppm and 29 ppm in dry hexane and in dry THF after pouring whereas it was initially  
62 13 ppm and 16 ppm before addition of Li<sub>4</sub>-PTC.

## 2. Supplemental figures and discussion.

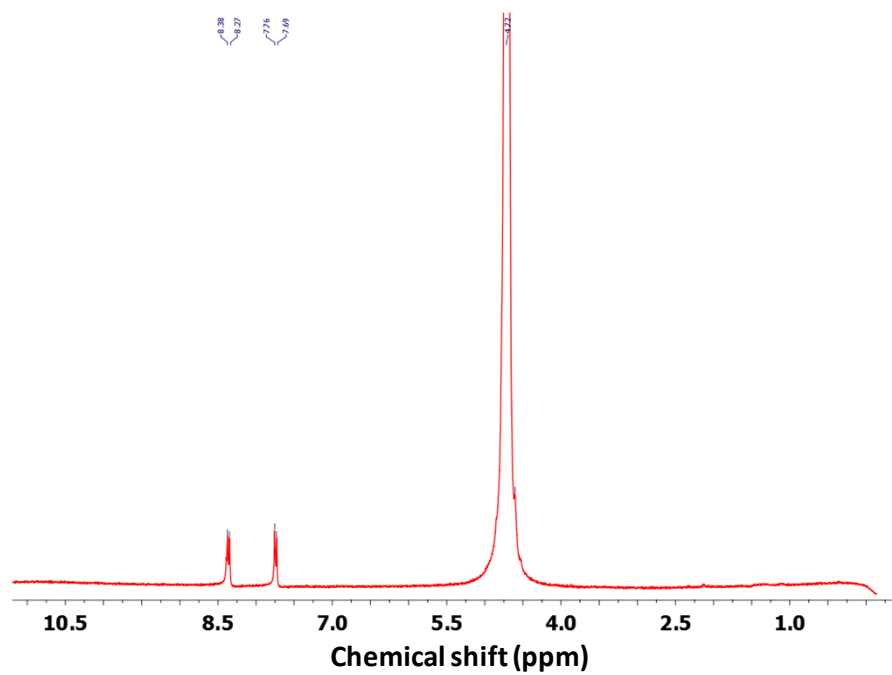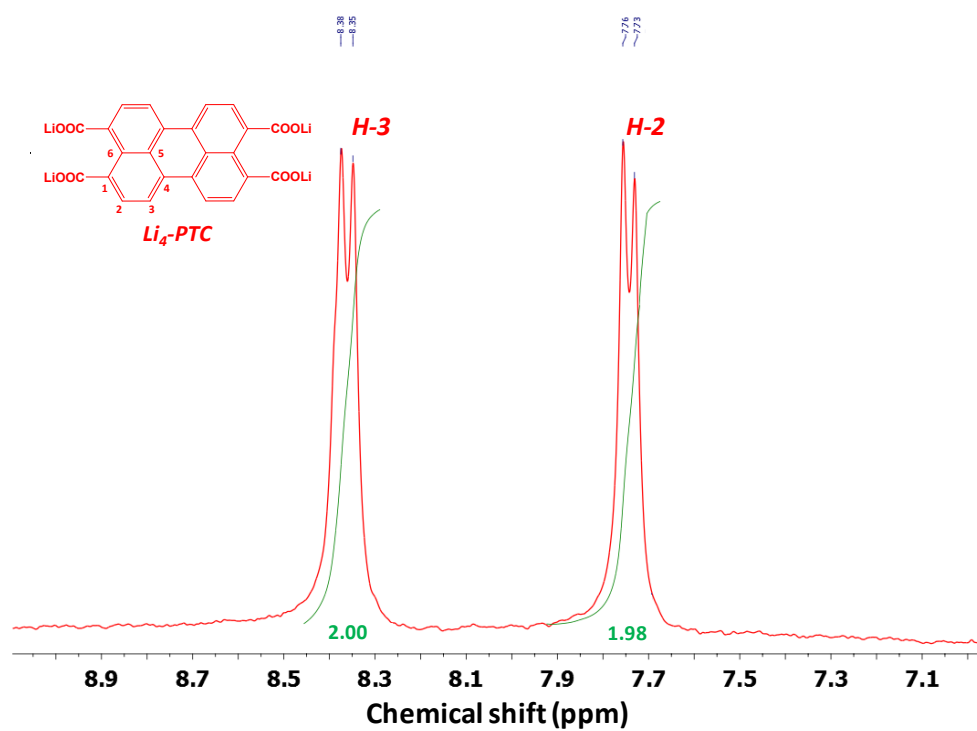

**Fig S1**  $^1\text{H}$  liquid NMR spectrum of  $\text{Li}_4\text{-PTC}$  performed in  $\text{D}_2\text{O}$  (a) full spectrum and (b) zoomed on aromatic region.

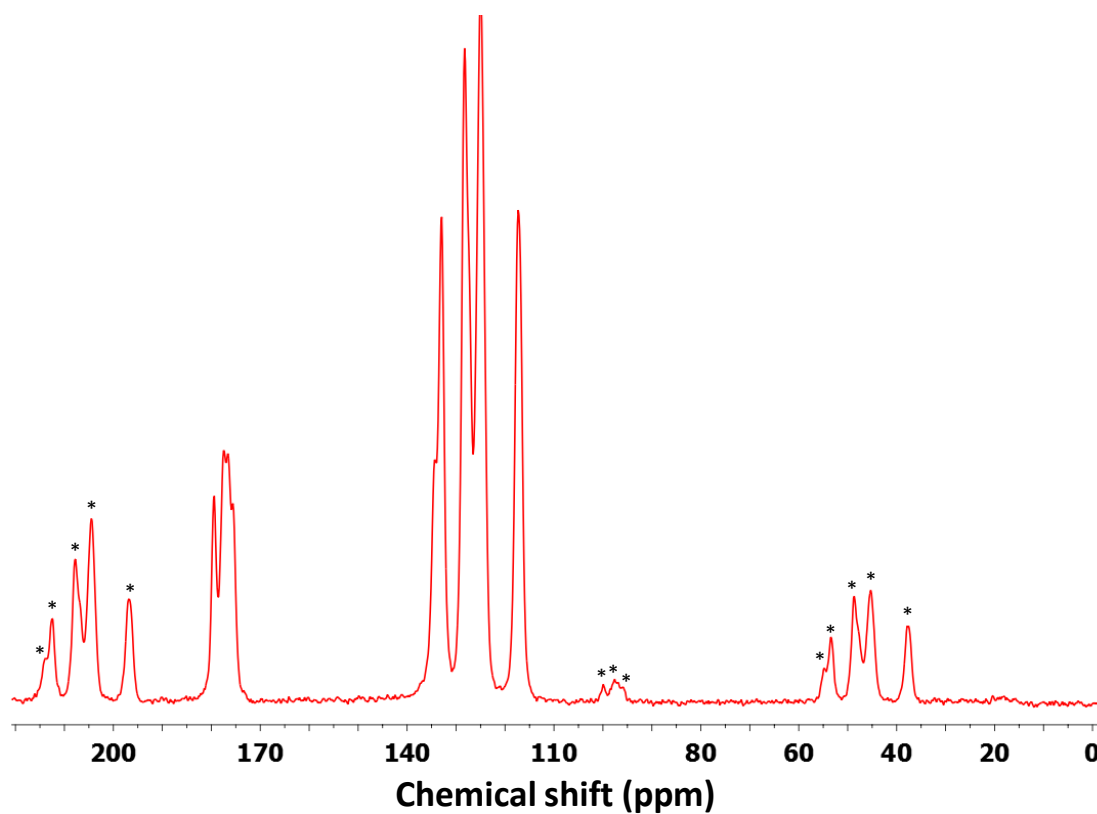

70

71 **Fig S2** Solid-State NMR  $^{13}\text{C}$  spectrum of  $\text{Li}_4\text{-PTC}$  using CP MAS sequence. Rotation bands are marked  
72 with an asterisk.

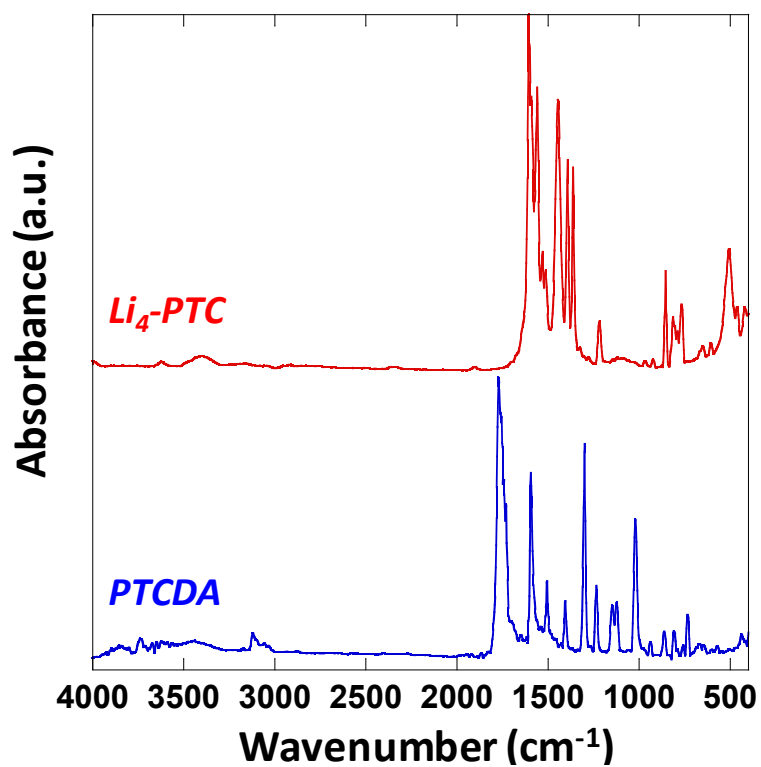

73

74 **Fig S3** Comparison between pristine PTCDA (blue curve) and precipitated  $\text{Li}_4\text{-PTC}$  solid (red curve) by  
75 FT-IR in transmission mode.

|                          | Wavenumber in $\text{cm}^{-1}$ |                                             |                    |                                             |                                             |                                             |                    |                       |                                                  |                                                    |
|--------------------------|--------------------------------|---------------------------------------------|--------------------|---------------------------------------------|---------------------------------------------|---------------------------------------------|--------------------|-----------------------|--------------------------------------------------|----------------------------------------------------|
| PTDCA                    | 1772                           | 1594                                        | 1506               | 1405                                        | 1300                                        | 1236                                        | 1122               | 862                   | 808                                              | 733                                                |
| $\text{Li}_4\text{-PTC}$ | 1598<br>1447                   | 1560                                        | 1533               | 1510                                        | 1393<br>1362                                | 1218                                        | -                  | 856                   | 813                                              | 767                                                |
| Attribution              | $\nu_{\text{C=O}}$             | $\nu_{\text{C-C}}$<br>$\delta_{\text{C-H}}$ | $\nu_{\text{C-C}}$ | $\nu_{\text{C-C}}$<br>$\delta_{\text{C-C}}$ | $\delta_{\text{C-H}}$<br>$\nu_{\text{C-C}}$ | $\nu_{\text{C-C}}$<br>$\delta_{\text{C-H}}$ | $\nu_{\text{C-O}}$ | $\delta_{\text{C-H}}$ | $\delta_{\text{C-H}}$<br>$\delta_{\text{C-C-C}}$ | $\delta_{\text{O=C-C}}$<br>$\delta_{\text{C-O-C}}$ |

**Table S1:** FT-IR bands attribution based on complete description of PTDCA spectra in the reference 14 of the manuscript.

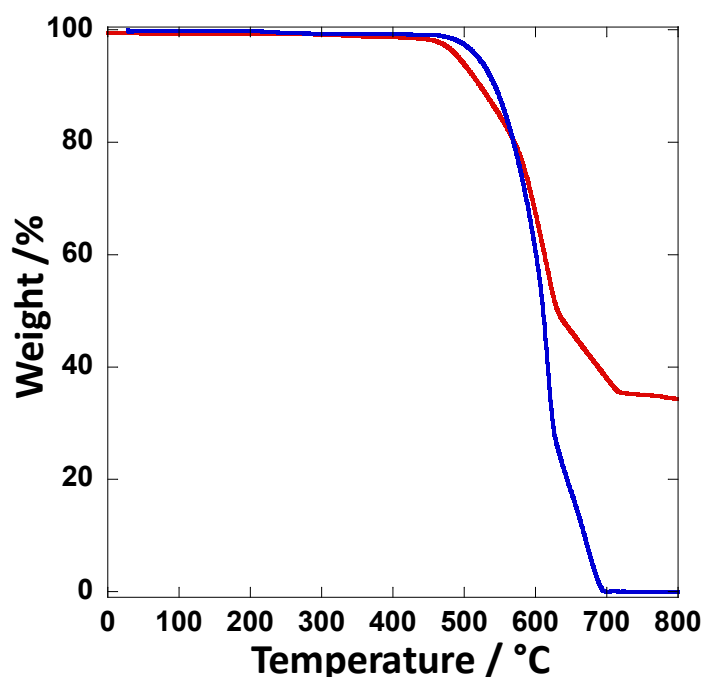

**Fig. S4** Comparison between pristine PTDCA (blue curve) and precipitated  $\text{Li}_4\text{-PTC}$  solid (red curve) by thermogravimetric analysis under air. Their thermal degradation onset at 450 °C. It proceeds in one step leading to a weight loss of 67 % for  $\text{Li}_4\text{-PTC}$  and a total loss for PTDCA. This mass loss arises from the degradation of the hydrocarbon backbone leading to  $\text{CO}$ ,  $\text{CO}_2$  and  $\text{H}_2\text{O}$ . The residual solid left in the crucible for  $\text{Li}_4\text{-PTC}$  corresponds to the lithium carbonate ( $\text{Li}_2\text{CO}_3$ ) whose amount of 33 % is in excellent consistency with the four lithium stoichiometry. This emphasizes once again on the advantage held by such organic electrode materials in terms of recyclability because of their easier retrieval process of the initial lithium

89 content. Worth mentioning, although stored into a glove box, the material does not show  
 90 hygroscopic features. The content of adsorbed water was determined to be almost  
 91 insignificant (0.6 % in mass).

92

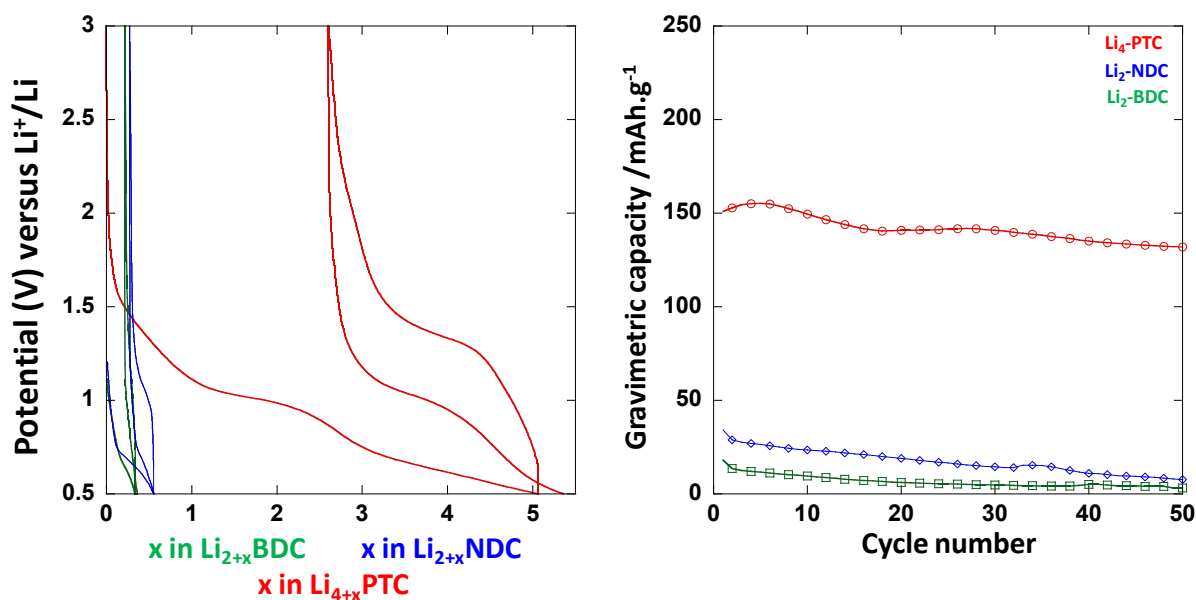

93

94 **Fig. S5** (a) Potential-composition profiles and (b) corresponding gravimetric capacity as function of cycle  
 95 number over 50 cycles of Dilithium Benzene-1,4-diCarboxylate ( $\text{Li}_2\text{-BDC}$ , green curve), Dilithium  
 96 Naphthalene-2,6-diCarboxylate ( $\text{Li}_2\text{-NDC}$ , blue curve) and Tetralithium Perylen-3,4,9,10-tetraCarboxylate ( $\text{Li}_4\text{-PTC}$ , red curve) galvanostatically cycled at 5  $\text{Li}^+/\text{h}$  rate.

98

99

100

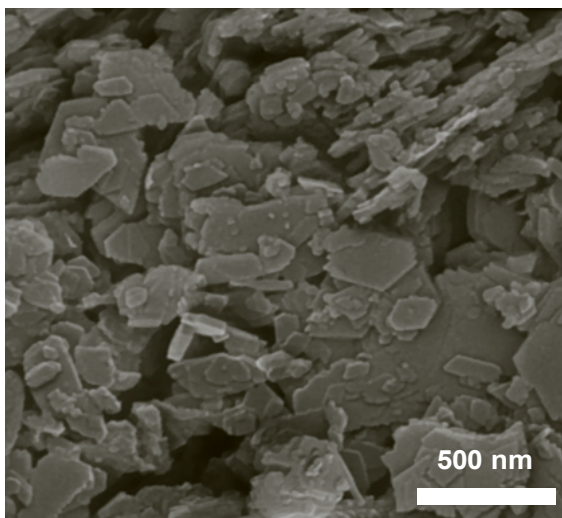

101

102 **Fig. S6** Scanning Electron Micrograph of  $\text{Li}_4\text{-PTC}$ .
